# Supplementary material for: Fe(TCNQ)2 nanorod arrays: an efficient electrocatalyst for electrochemical ammonia synthesis via the nitrate reduction reaction
Source: Royal Society of Chemistry journal article supplement (doi:10.1039/d3ta05300h), 2023-12-02
Supplement: d3ta05300h1.pdf [file d3ta05300h1.pdf]

## **Supporting Information**

### **Fe(TCNQ)<sub>2</sub> nanorod arrays: an efficient electrocatalyst for electrochemical ammonia synthesis *via* nitrate reduction reaction**

Nilmadhab Mukherjee<sup>1</sup>, Ashadul Adalder<sup>1</sup>, Narad Barman<sup>2</sup>, Ranjit Thapa<sup>2</sup>, Rajashri Urkude<sup>3</sup>, Biplab Ghosh<sup>3</sup> and Uttam Kumar Ghorai<sup>1\*</sup>

<sup>1</sup>Department of Industrial Chemistry & Applied Chemistry, Swami Vivekananda Research Centre, Ramakrishna Mission Vidyamandira, Belur Math, Howrah - 711202, India

<sup>2</sup>Department of Physics and Centre for Computational and Integrative Sciences, SRM University – AP, Amaravati 522240, Andhra Pradesh, India

<sup>3</sup>Beamline Development & Application Section, Bhabha Atomic Research Center, Trombay, Mumbai 400085, India

\* E-mail: [uttam.indchem@vidyamandira.ac.in](mailto:uttam.indchem@vidyamandira.ac.in)

### **SI 1: Determination of ammonia using UV-vis spectrophotometer:**

By employing a UV-vis spectrophotometer and the indophenol blue technique, ammonia was measured. To create a 1M sodium hydroxide (Merck) solution that would serve as the colouring solution, 5 wt% trisodium citrate dihydrate (Merck) and 5 wt% salicylic acid (Merck) were added. As an oxidising agent, 0.05 M sodium hypochlorite (Merck) solution was utilised. Catalyst solution contained 3.34 mmol of sodium nitroprusside dihydrate (Loba Chemie). After  $\text{NO}_3\text{RR}$  electrolysis, 2 mL of colouring solution, 1 mL of oxidising solution, and 0.2 mL of catalyst solution were combined with 2 mL of electrolyte solution after certain dilution. After incubating the resultant solution at room temperature for two hours, it was spectrophotometrically examined. Indophenol was found to be present in the combination solution according to the maximum absorbance at  $\sim 655$  nm. After incubating the combination solution at room temperature for two hours, it was examined in a UV-vis spectrophotometer. The production of indophenol was verified by the maximum absorbance peak at  $\sim 655$  nm. With concentrations ranging from 0.0 to 1.0 ( $\mu\text{g/mL}$ ) in 0.1M  $\text{Na}_2\text{SO}_4$  solution, ammonium ion concentration was employed for calibration using ammonium chloride (Merck). Following calibration, the fitting curve from ( $y=0.1282x + 0.0425$ ,  $R^2 = 0.999$ ) showed an optimised linear relationship of absorbance with ammonia concentration.

### **SI 2: Nafion 117 membrane treatment:**

The membrane was prepared for the test by boiling it in distilled water for an hour and then treated it with a 5%  $\text{H}_2\text{O}_2$  aqueous solution at 80 °C for an hour. The membrane was once again treated in 0.5 M  $\text{H}_2\text{SO}_4$  for 2 hours at 80 °C before being heated in distilled water for another 6 hours.

### SI 3: Isotope labelling experiments by $^1\text{H}$ NMR method:

An isotope-labelled tracer electrochemical experiment utilising a solution of  $\text{Na}^{15}\text{NO}_3$  (98 atom%  $^{15}\text{N}$  Sigma-Aldrich Co. as the nitrogenous source) as the nitrogenous source was used to verify the electrochemically produced  $^{15}\text{NH}_3$  from  $^{15}\text{NO}_3^-$ . After an hour of electrocatalytic nitrate reduction, the  $^{15}\text{NH}_4^+$  produced in the electrolyte solution was assessed using  $^1\text{H}$ -NMR (600 MHz) spectroscopy. Before the NMR analysis, the NMR sample was prepared by mixing 0.4 mL electrolyte (acidified with 0.05 M  $\text{H}_2\text{SO}_4$ ) with 0.1 mL  $\text{D}_2\text{O}$  as an internal standard solvent for NMR.

### SI4: Formula for the ammonia yield rate and Faradaic efficiency calculation

The following equation was used to calculate the rate of ammonia formation:

$$\text{Rate of } \text{NH}_3 = \frac{(C_{\text{NH}_3} \times V)}{t \times S}$$

Where  $V$  is the volume of the  $\text{NO}_3\text{RR}$  electrolyte,  $t$  is the reduction period,  $S$  is the catalytic surface area, and  $C_{\text{NH}_3}$  is the concentration of ammonia after the  $\text{NO}_3\text{RR}$ .

According to the following equation, the faradaic efficiency may be determined:

$$\text{FE (\%)} = \frac{(8 \times F \times C_{\text{NH}_3} \times V)}{M \times Q} \times 100\%$$

$F$  is the Faraday Constant, which is  $96485.33 \text{ C mol}^{-1}$ .  $C_{\text{NH}_3}$  is the amount of ammonia left over after  $\text{NO}_3\text{RR}$ ,  $V$  is the volume of  $\text{NO}_3\text{RR}$  electrolyte,  $Q$  denotes the total charge that travelled through the electrode during reduction, and  $M$  denotes the molar mass of ammonia.

The following equation may be used to determine the number of turnovers and turnover frequency:<sup>1</sup>

$$\text{TOF} = \frac{(\text{Yield rate, } \mu\text{g h}^{-1} \text{cm}^{-2}) \times \text{Geometric surface area} \times N_A}{\text{Surface active sites} \times \text{Molar mass of ammonia} \times \text{ECSA}}$$

$$\text{Surface sites} = \left( \frac{\text{Atoms per unit cell}}{\text{Volume per unit cell}} \right)^{\frac{2}{3}}$$

Fe(TCNQ)<sub>2</sub> is a monoclinic system.<sup>2</sup>

Volume per unit cell = 1051.974 Å<sup>3</sup>

So, Fe(TCNQ)<sub>2</sub> system the surface sites is 1.53 x 10<sup>14</sup> cm<sup>-2</sup>.

ECSA stands for electrochemical active surface area (252 cm<sup>2</sup>), while N<sub>A</sub> is the Avogadro constant (6.023 x 10<sup>23</sup> mol<sup>-1</sup>)

Geometric surface area: 0.9 cm<sup>2</sup>

Yield rate: 11351.6 µg h<sup>-1</sup> cm<sup>-2</sup>

Molar mass of ammonia: 17 g/mol

$$\text{TOF} = \frac{(11351.6, \mu\text{g h}^{-1}\text{cm}^{-2}) \times (0.9, \text{cm}^2) \times (6.023 \times 10^{23}, \text{mol}^{-1})}{(1.53 \times 10^{14}, \text{cm}^{-2}) \times (17, \text{g mol}^{-1}) \times (252, \text{cm}^2)}$$

$$\text{TOF} = \frac{(11351.6 \times 10^{-6}, \text{g cm}^{-2}) \times (0.9, \text{cm}^2) \times (6.023 \times 10^{23}, \text{mol}^{-1})}{(1.53 \times 10^{14}, \text{cm}^{-2}) \times (17, \text{g mol}^{-1}) \times (252, \text{cm}^2) \times (3600, \text{s})}$$

$$\text{TOF} = 2.6 \text{ s}^{-1}$$

### S15: Computational details:

In this work, we have used density functional theory based VASP code as a computational tool to perform the required simulations. Because of periodic nature of the system considered here plane wave basis set is incorporated and plane waves are expanded within a maximum kinetic energy cut-off of 520 eV<sup>3</sup>. In case of total energy calculations, we have introduced two types of convergence criteria for ionic and electronic relaxations, one is energy convergence which is set to be 1E<sup>-6</sup> eV and another one is ionic force convergence, set to be - 0.01 eV/Å. To illustrate the effects of exchange and correlation forces among electrons, many approximations method are reported, here we have applied General Gradient Approximation of PBE functional<sup>4</sup>. Projected Augmented Wave method has been used to demonstrate the

pseudo potential based interaction between core and valence electrons, created by freezing the core part. Long range weak Van der Waal forces among atoms in the given system are managed by employing Grimme DFT-D2 dispersion scheme<sup>5</sup>. To sample the Brillouin zone of the reporting system in k-space, we have applied popular k-point sampling method, Monk-Horst grid method, with 5 X 5 X 1 k-points for structural optimization and 9 X 9 X 1 k-points assumed for DOS calculations.

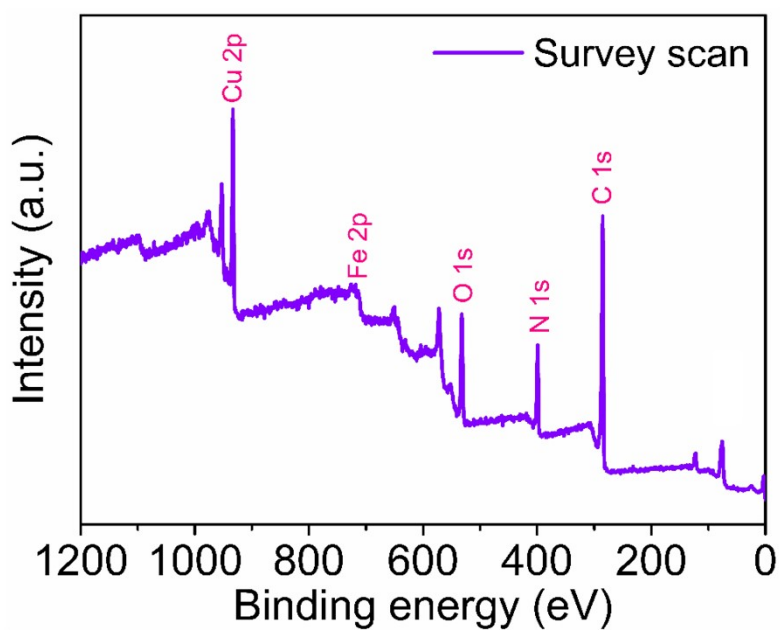

**Fig. S1:** XPS survey scan of Fe(TCNQ)<sub>2</sub>/CF (before electrolysis)

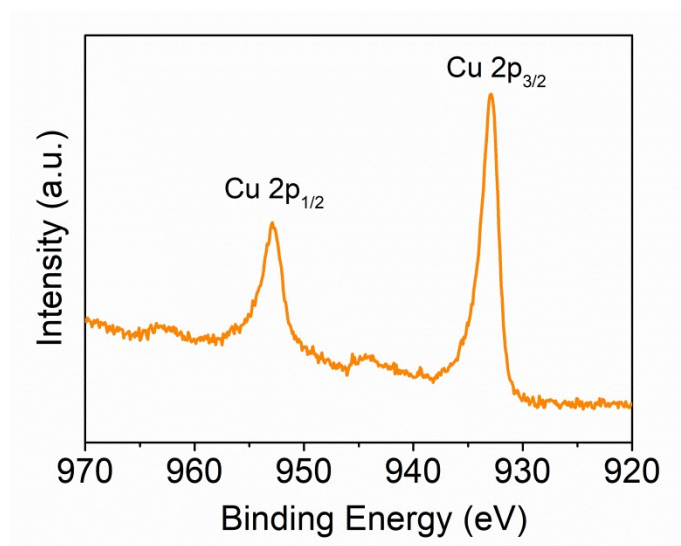

**Fig. S2:** High resolution XPS spectrum of Cu 2p in Fe(TCNQ)<sub>2</sub>/CF

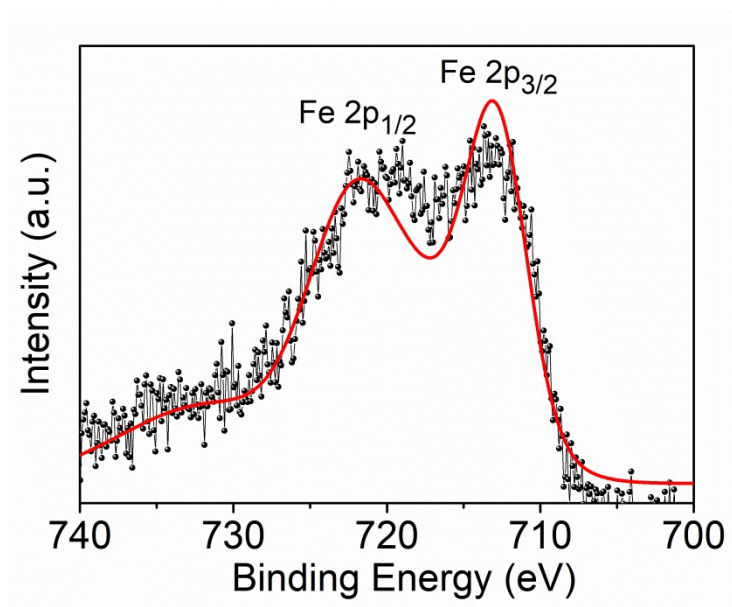

**Fig. S3:** High resolution XPS spectrum of Fe 2p of Fe(TCNQ)<sub>2</sub>/CF (after electrolysis)

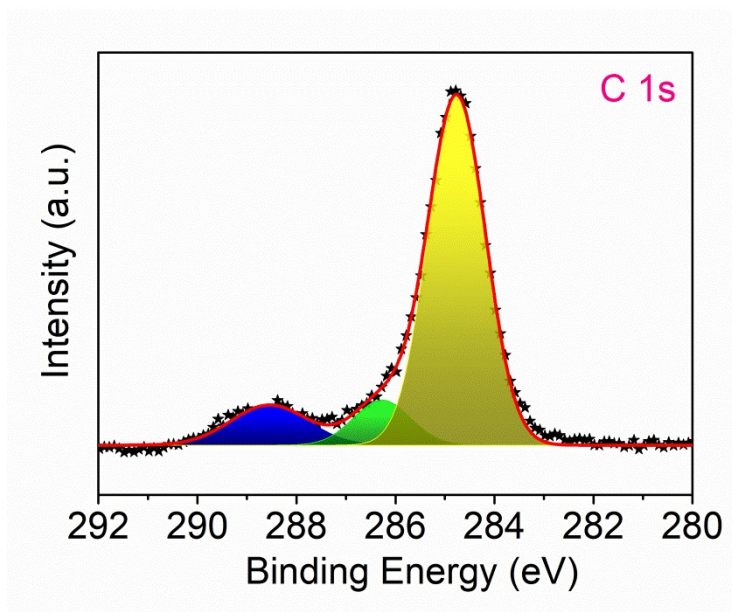

**Fig. S4:** High resolution XPS spectrum of C 1s of  $\text{Fe}(\text{TCNQ})_2/\text{CF}$  (after electrolysis)

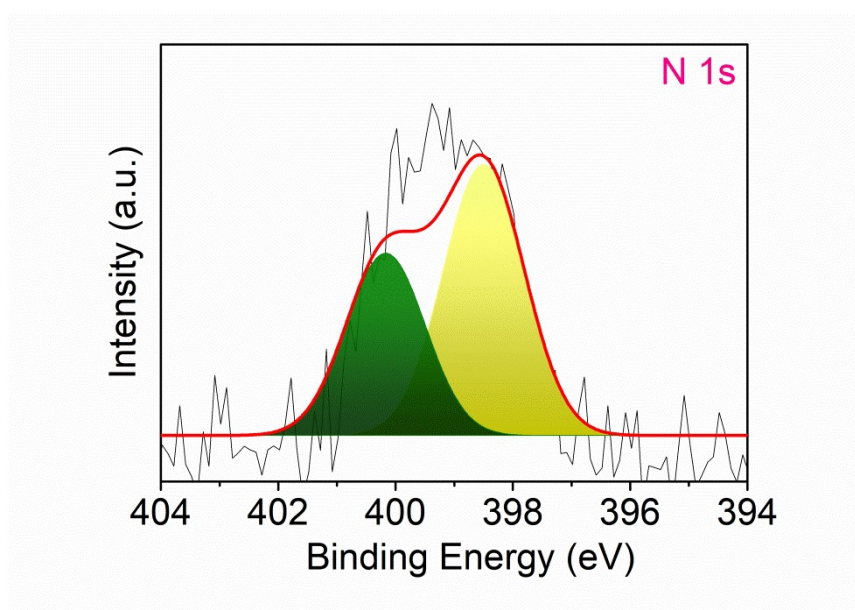

**Fig. S5:** High resolution XPS spectrum of N 1s of  $\text{Fe}(\text{TCNQ})_2/\text{CF}$  (after electrolysis)

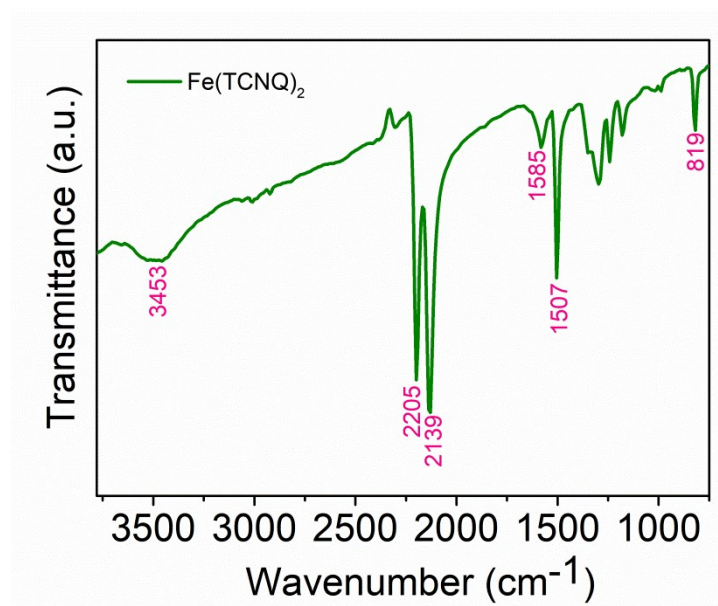

**Fig. S6:** FTIR spectrum of  $\text{Fe}(\text{TCNQ})_2$

The production of the  $\text{Fe}(\text{TCNQ})_2$  is supported by the FT-IR findings. Resolved bands at 2139, and 2205  $\text{cm}^{-1}$ , which are in agreement with the C≡N band, corresponds to the existence of TCNQ. Simultaneously, the C=C and C-H bending bands of TCNQ are indicated by two typical peaks at 1502 and 816  $\text{cm}^{-1}$ . A wide band at 3460  $\text{cm}^{-1}$  and a faint peak at 1586  $\text{cm}^{-1}$  show coordinated water molecules are present in the post-synthetic material.<sup>6,7</sup>

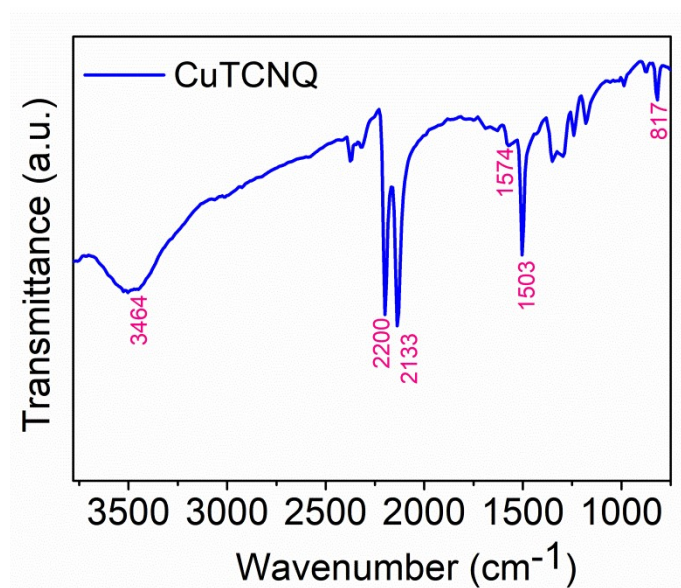

**Fig. S7:** FTIR spectrum of  $\text{CuTCNQ}$

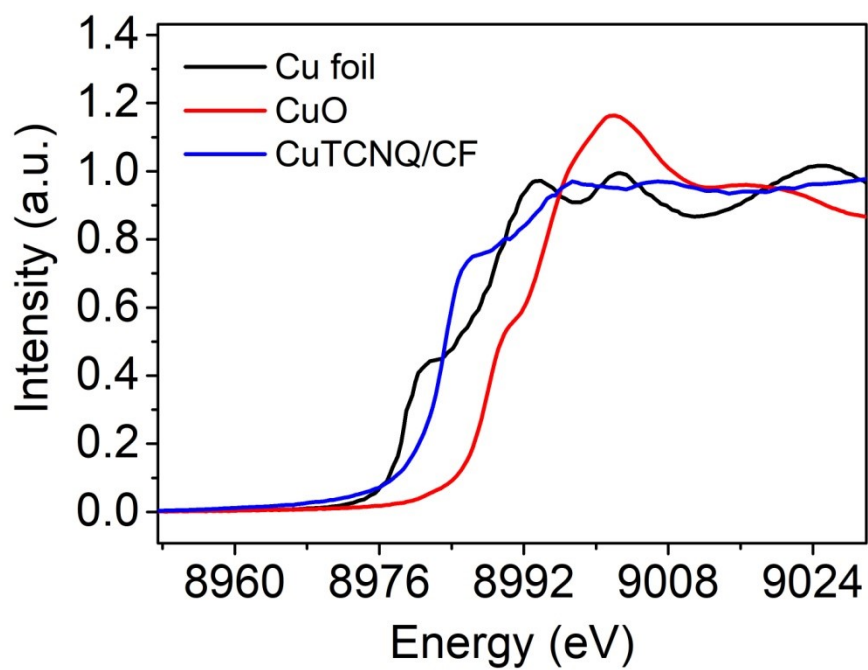

**Fig. S8:** XANES spectra of Cu foil, CuO and CuTCNQ/CF

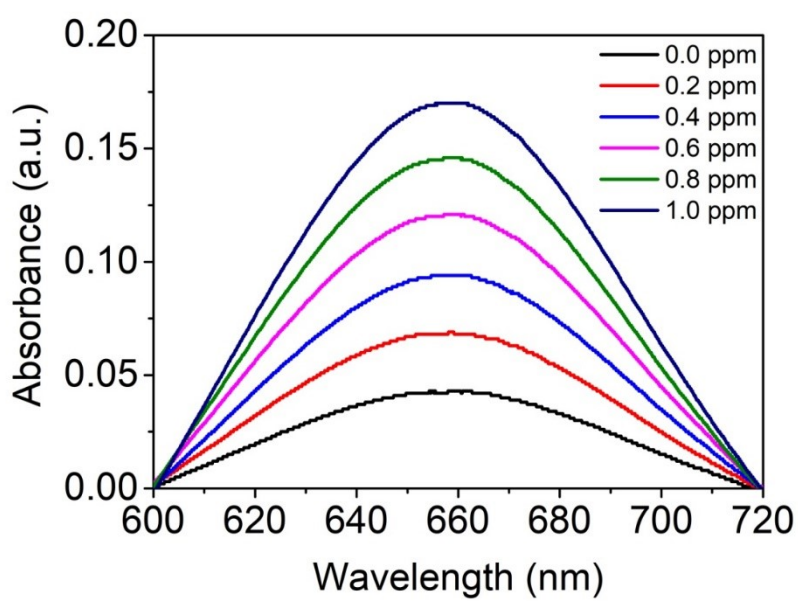

**Fig. S9:** Calibration of ammonium solutions with known concentrations

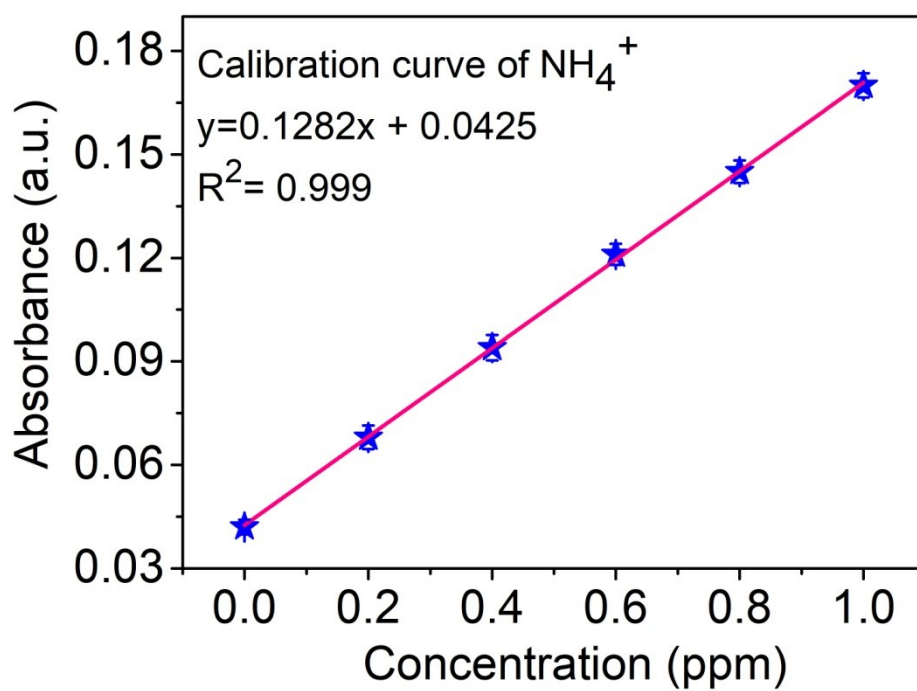

**Fig. S10:** The standard curve of absorbance as a function of  $\text{NH}_4^+$  concentration

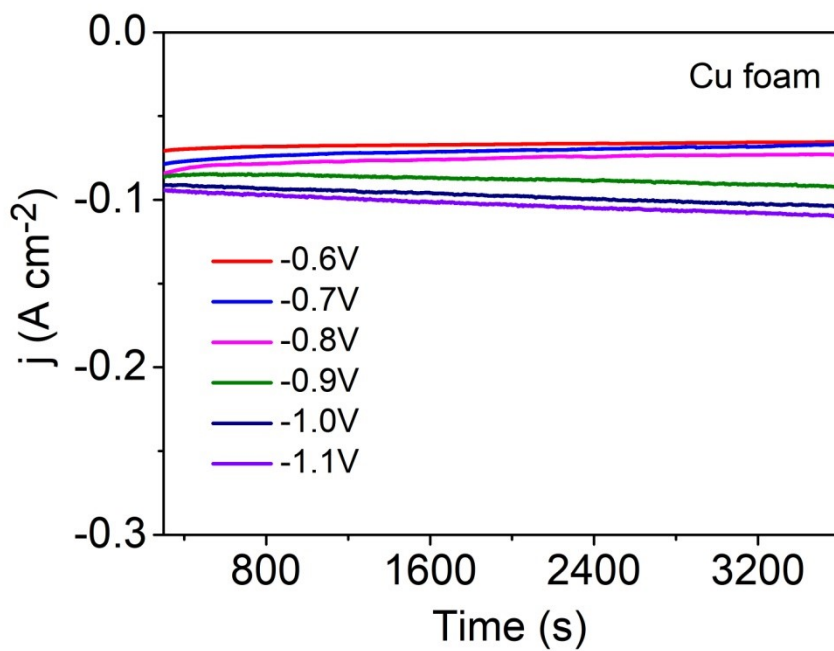

**Fig. S11:** The  $j$ - $t$  curves of  $\text{NO}_3\text{RR}$  test for Cu foam

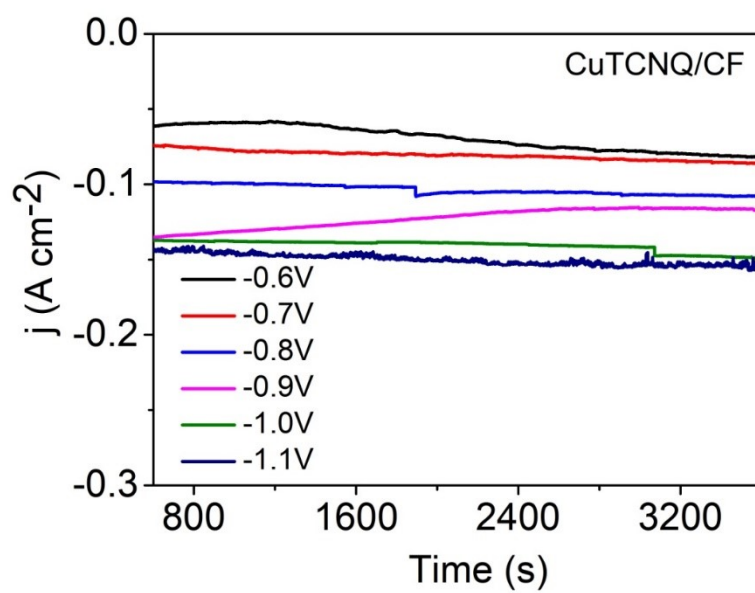

**Fig. S12:** The j-t curves of NO<sub>3</sub>RR test for CuTCNQ/CF

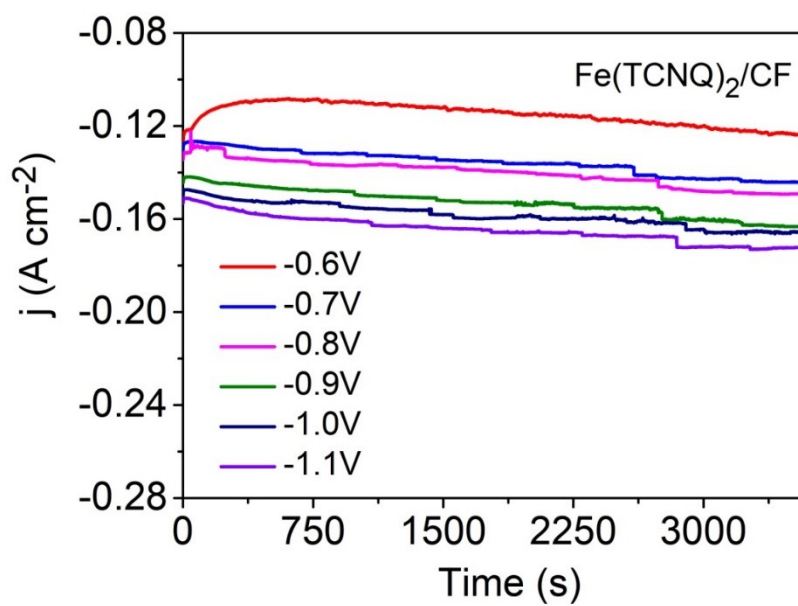

**Fig. S13:** The j-t curves of NO<sub>3</sub>RR test for Fe(TCNQ)<sub>2</sub>/CF

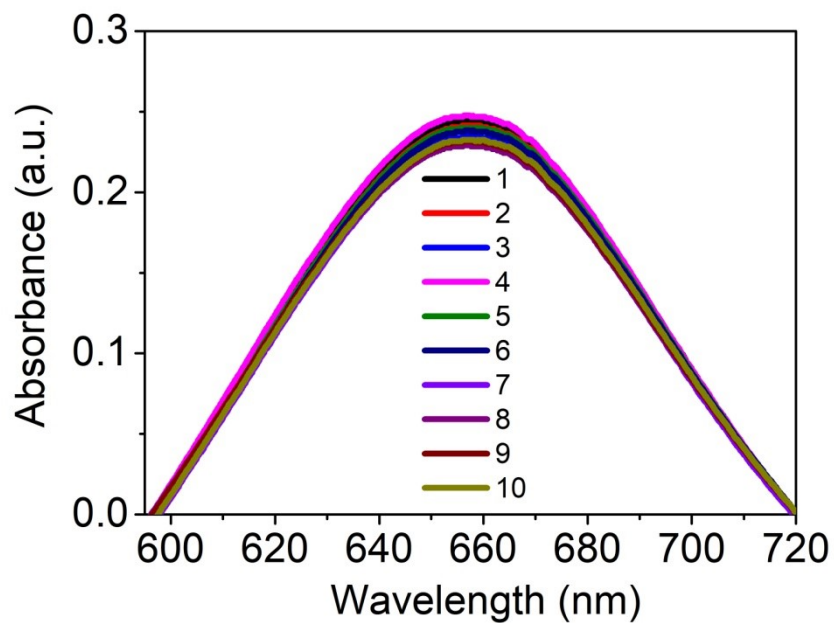

**Fig. S14:** The cycling tests of Fe(TCNQ)<sub>2</sub>/CF for reduction tests by UV-vis spectroscopy

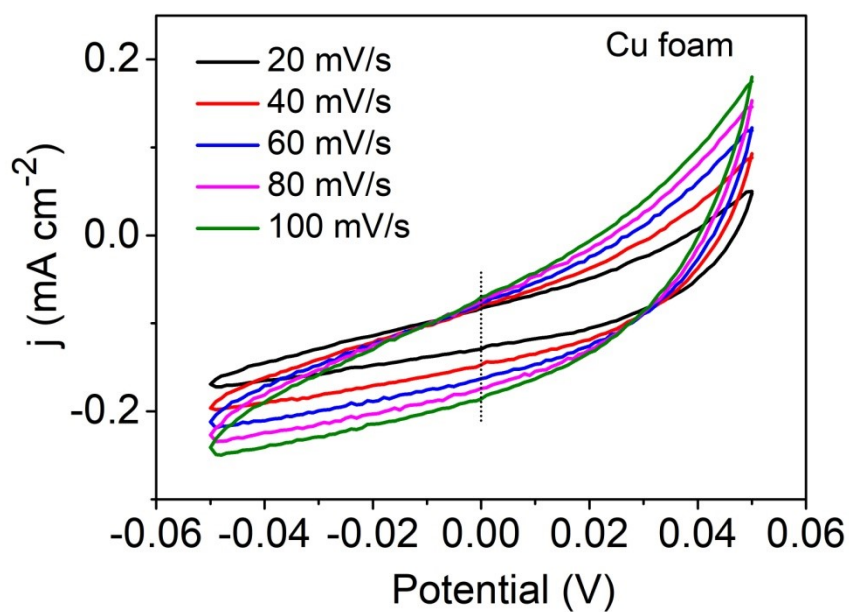

**Fig. S15:** CV curves at various scan rates (20, 40, 60, 80 and 100 mV s<sup>-1</sup>) for Cu foam

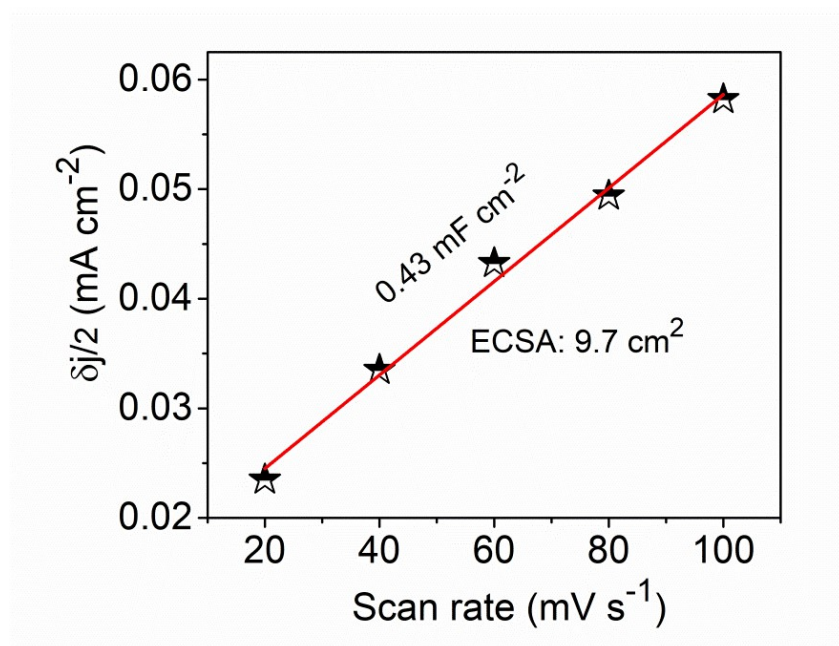

**Fig. S16:** The differences ( $\delta j/2$ ) between capacitive currents at the center of selected potential window as a function of scan rate for Cu foam

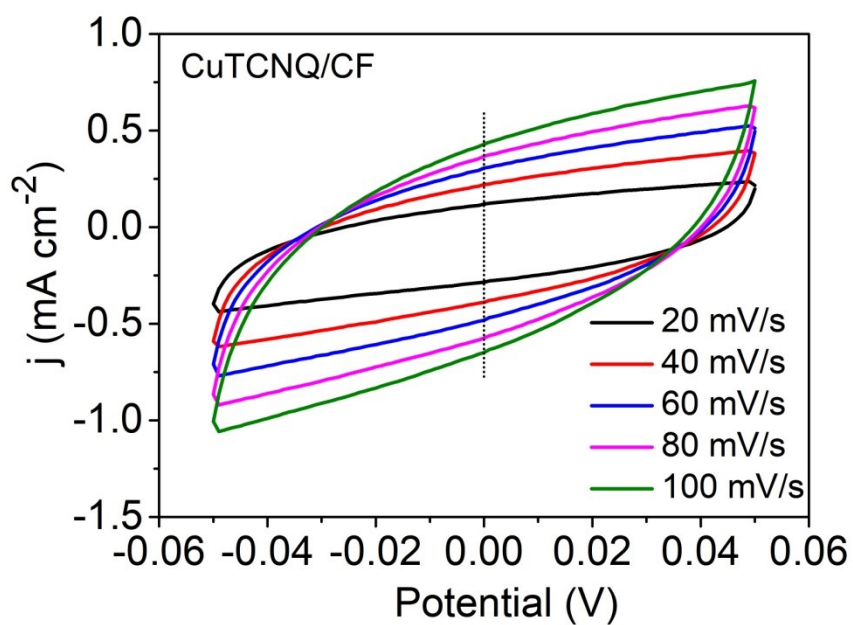

**Fig. S17:** CV curves at various scan rates (20, 40, 60, 80 and 100 mV s<sup>-1</sup>) for CuTCNQ/CF

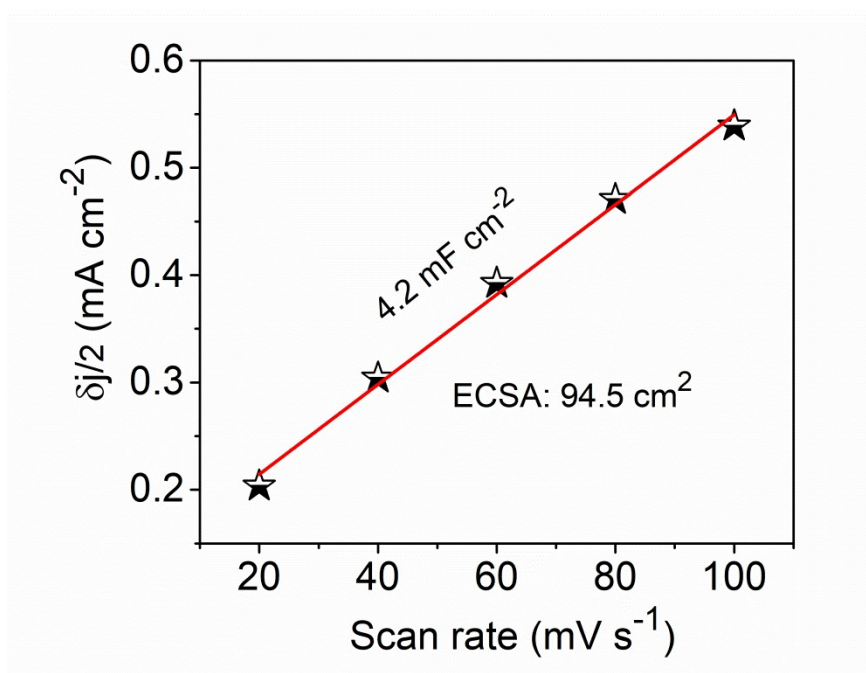

**Fig. S18:** The differences ( $\delta j/2$ ) between capacitive currents at the center of selected potential window as a function of scan rate for CuTCNQ/CF

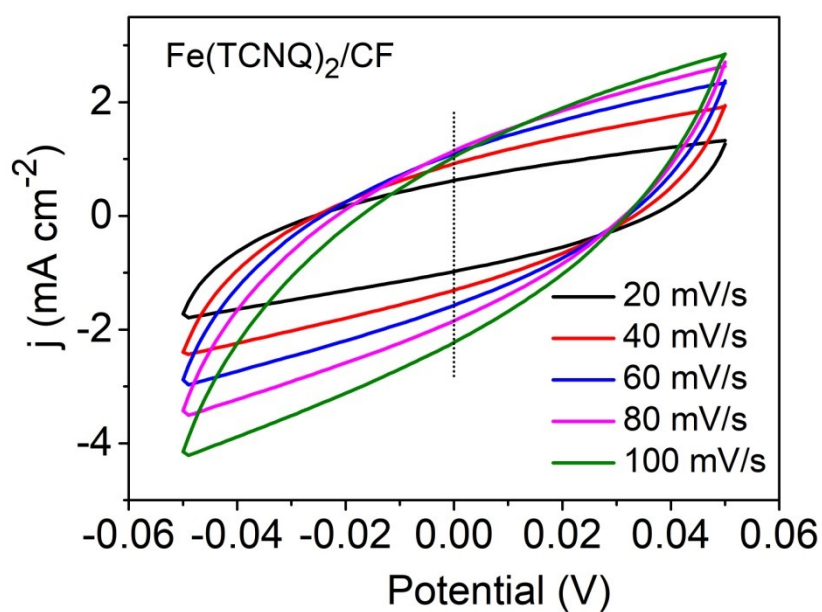

**Fig. S19:** CV curves at various scan rates (20, 40, 60, 80 and 100 mV s<sup>-1</sup>) for Fe(TCNQ)<sub>2</sub>/CF

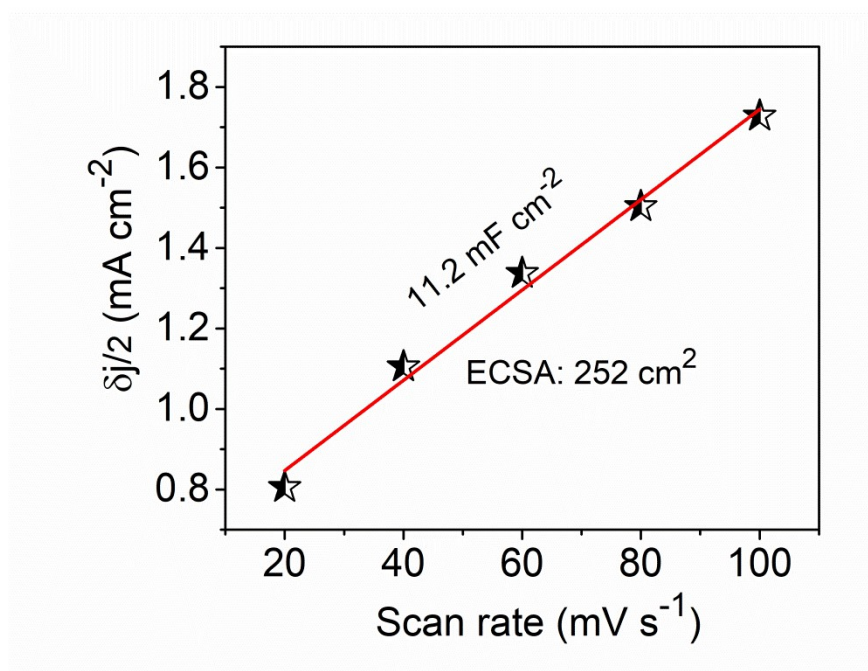

**Fig. S20:** The differences ( $\delta j/2$ ) between capacitive currents at the center of selected potential window as a function of scan rate for  $\text{Fe}(\text{TCNQ})_2/\text{CF}$

By dividing the measured  $C_{dl}$  by the capacitance of the generally used specific capacitance for the catalytic system over a unit surface area, the electrochemically surface area (ECSA) was computed, and specific capacitance ( $C_s$ ) value is taken as  $40 \mu\text{F}/\text{cm}^2$ .<sup>8</sup>

We have calculated the electrochemical active surface area (ECSA):

$$\text{ECSA} = R_f \times S$$

Where  $R_f$  stands for roughness factor of the working electrode:

$$R_f = (C_{dl} \div C_s) = (C_{dl} \div 40 \mu\text{F cm}^{-2})$$

$S$  represents the geometric surface area of the electrode

The geometric surface area of the working electrode =  $0.9 \text{ cm}^2$

#### Calculation:

For  $\text{Fe}(\text{TCNQ})_2/\text{CF}$ ,

$$C_{dl} = 11.2 \text{ mF cm}^{-2}, \text{ so } R_f = \{ (11.2 \times 1000) \div 40 \} = 280$$

$$\text{ECSA} [\text{Fe}(\text{TCNQ})_2/\text{CF}] = 280 \times 0.9 = 252 \text{ cm}^2$$

For  $\text{CuTCNQ}/\text{CF}$ ,

$$C_{dl} = 4.2 \text{ mF cm}^{-2}, \text{ so } R_f = \{ (4.2 \times 1000) \div 40 \} = 105$$

$$\text{ECSA [CuTCNQ/CF]} = 105 \times 0.9 = 94.5 \text{ cm}^2$$

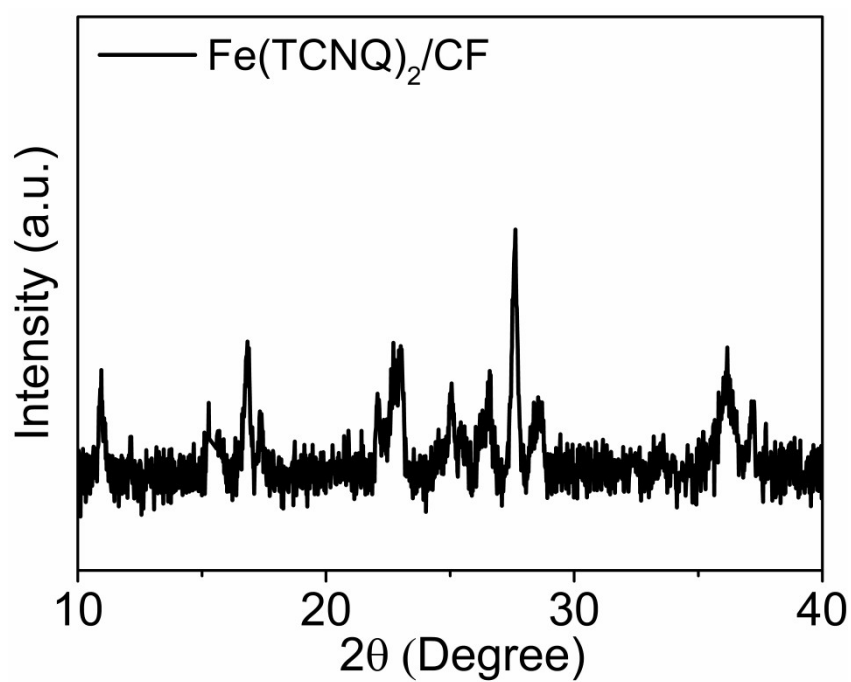

**Fig. S21:** XRD pattern for  $\text{Fe(TCNQ)}_2/\text{CF}$  (after electrolysis)

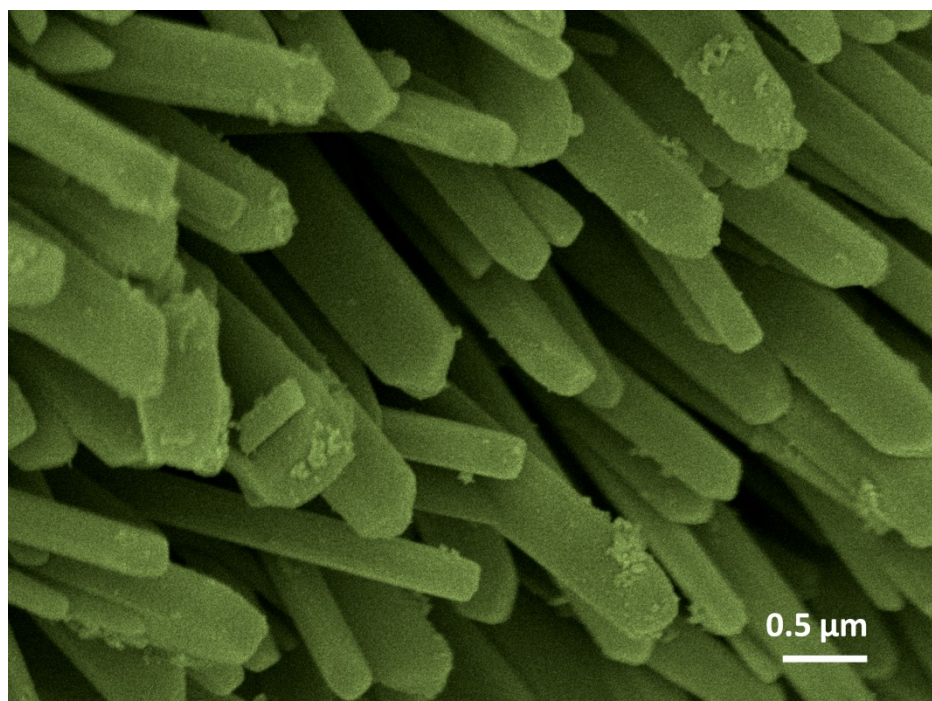

**Fig. S22:** FESEM image of  $\text{Fe(TCNQ)}_2/\text{CF}$  (after electrolysis)

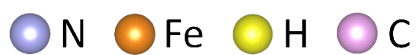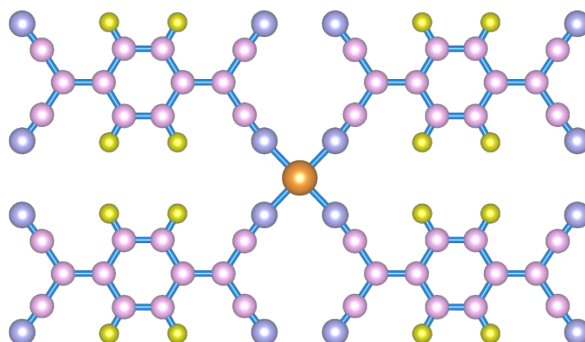

**Fig. S23:**

Optimized model

structure of Fe-TCNQ

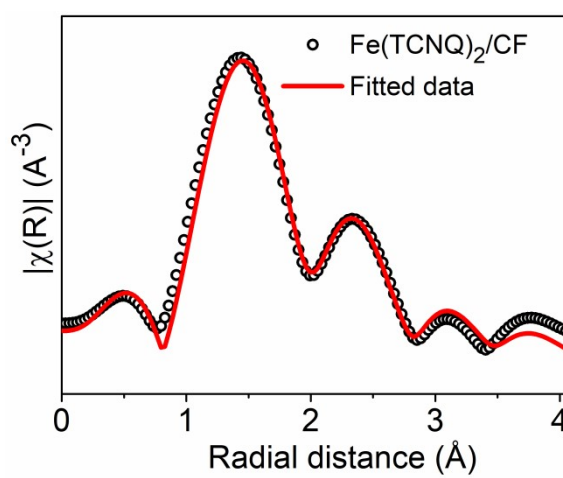

**Fig. S24:** Experimental  $\chi(R)$  vs  $R$  data of  $\text{Fe(TCNQ)}_2/\text{CF}$  measured at the Fe K-edge with fitting

**Table S1: EXAFS fitting parameters at the Fe K-edge for sample**

| Sample                    | Shell | $N$ | $R$ (Å)            | $\sigma^2$ (Å <sup>2</sup> ) | $\Delta E_0$ (eV) | $R$ factor |
|---------------------------|-------|-----|--------------------|------------------------------|-------------------|------------|
| Fe(TCNQ) <sub>2</sub> /CF | Fe-N  | 4   | 2.014 +/-<br>0.015 | 0.002 +/-<br>0.001           | -0.98 +/-<br>2.08 | 0.0157     |

$N$ : coordination number;  $R$ : bond distance;  $\sigma^2$ : Debye-Waller factor;  $\Delta E_0$ : the inner potential correction.  $R$  factor: goodness of fit.  $S_0^2$  was set as 0.754.

**Table-S2**

| Adsorbed Molecule  | ZPE (eV) | TS (eV)  | ZPE-TS (eV) |
|--------------------|----------|----------|-------------|
| NO <sub>3</sub>    | 0.396038 | 0.219128 | 0.17691     |
| NO <sub>3</sub> H  | 0.695769 | 0.367404 | 0.328365    |
| NO <sub>2</sub>    | 0.272663 | 0.154073 | 0.11859     |
| NO <sub>2</sub> H  | 0.59261  | 0.216491 | 0.376119    |
| NO                 | 0.185625 | 0.157299 | 0.028327    |
| NHO                | 0.4512   | 0.127954 | 0.323246    |
| NHOH               | 0.801001 | 0.166158 | 0.634843    |
| NH <sub>2</sub> OH | 1.113142 | 0.174641 | 0.938502    |
| NH <sub>2</sub>    | 0.680361 | 0.092387 | 0.587973    |
| NH <sub>3</sub>    | 1.000728 | 0.153737 | 0.846991    |
| N                  | 0.081048 | 0.051131 | 0.029917    |
| NH                 | 0.32335  | 0.09107  | 0.23228     |

**Table-S3**

| Free Molecule    | Total Energy (eV) |
|------------------|-------------------|
| NO <sub>3</sub>  | -23.745           |
| N <sub>2</sub>   | -16.63            |
| H <sub>2</sub> O | -14.25            |
| H                | -3.45             |
| NH <sub>3</sub>  | -19.24            |

**Table-S4:** A comparison table of performance NO<sub>3</sub>RR with other previously reported catalysts

| Catalyst                                    | Electrolyte                                                                               | Potential (V) | Yield rate                                               | FE (%)      | Reference        |
|---------------------------------------------|-------------------------------------------------------------------------------------------|---------------|----------------------------------------------------------|-------------|------------------|
| Fe SAC                                      | K <sub>2</sub> SO <sub>4</sub> /<br>KNO <sub>3</sub>                                      | -0.66 V       | 0.46 mmol h <sup>-1</sup> cm <sup>-2</sup>               | ~ 75%       | <sup>9</sup>     |
| Au-Cu<br>NWs/CF                             | 0.1 M Na <sub>2</sub> SO <sub>4</sub> +<br>10.0 mM KNO <sub>3</sub>                       | -1.05 V       | 5336.0 ± 159.2 mg h <sup>-1</sup><br>cm <sup>-2</sup>    | 84.1 ± 1.0% | <sup>10</sup>    |
| Cu <sub>3</sub> Fe                          | 0.1 M Na <sub>2</sub> SO <sub>4</sub> +<br>100 ppm NO <sub>3</sub> <sup>-</sup>           | -0.7 V        | --                                                       | 81.1%       | <sup>11</sup>    |
| Co <sub>3</sub> O <sub>4</sub> @NiO<br>HNTs | 0.5 mol L <sup>-1</sup><br>Na <sub>2</sub> SO <sub>4</sub> + 200<br>ppm NaNO <sub>3</sub> | -0.70 V       | 6.93 mmol h <sup>-1</sup> g <sup>-1</sup>                | --          | <sup>12</sup>    |
| Fe-N/P-C                                    | 0.1 M KOH +<br>0.1 M KNO <sub>3</sub>                                                     | -0.8 V        | 17980 μg h <sup>-1</sup> mg <sub>cat</sub> <sup>-1</sup> | 90.3%       | <sup>13</sup>    |
| Indium in S<br>doped graphene               | 1 M KOH + 0.1<br>M KNO <sub>3</sub>                                                       | -0.5 V        | 220 mmol g <sup>-1</sup> <sub>cat</sub> h <sup>-1</sup>  | 75%         | <sup>14</sup>    |
| PTCDA/O-Cu                                  | 0.1 M PBS (500<br>ppm NO <sub>3</sub> <sup>-</sup> )                                      | -0.40 V       | 436 ± 85 μg h <sup>-1</sup> cm <sup>-2</sup>             | 85.9%       | <sup>15</sup>    |
| Cu <sub>3</sub> P NA/CF                     | 0.1 M PBS<br>(0.1 M NO <sub>3</sub> <sup>-</sup> )                                        | -0.50 V       | 1626.6 ± 36.1 μg h <sup>-1</sup> cm <sup>-2</sup>        | 91.2 ± 2.5% | <sup>16</sup>    |
| Fe-PPy SACs                                 | 0.1 M KOH +<br>0.1 M KNO <sub>3</sub>                                                     | -0.7 V        | 2.75 mg <sub>NH3</sub> h <sup>-1</sup> cm <sup>-2</sup>  | 100%        | <sup>17</sup>    |
| Cu SAC                                      | 0.1 M KOH +<br>0.1 M KNO <sub>3</sub>                                                     | -1.0 V        | 4.5 mg cm <sup>-2</sup> h <sup>-1</sup>                  | 84.7%       | <sup>18</sup>    |
| Fe@Fe <sub>2</sub> O <sub>3</sub>           | 50 ppm NaNO <sub>3</sub><br>+ 0.1M Na <sub>2</sub> SO <sub>4</sub>                        | -0.645 V      | 1505.9 μg h <sup>-1</sup> cm <sup>-2</sup>               | 85.2 ± 0.6% | <sup>19</sup>    |
| Fe(TCNQ) <sub>2</sub> /CF                   | 0.2 M NaNO <sub>3</sub> +<br>0.1 M Na <sub>2</sub> SO <sub>4</sub>                        | -1.1 V        | 11351.6 μg h <sup>-1</sup> cm <sup>-2</sup>              | 85.2%       | <b>This work</b> |

## References:

- 1 T. Xu, D. Ma, T. Li, L. Yue, Y. Luo, S. Lu, X. Shi, A. M. Asiri, C. Yang and X. Sun, *Chem. Commun.*, 2020, **56**, 14031–14034.
- 2 P. J. Spellane, L. V. Interrante, R. K. Kullnig and F. S. Tham, *Inorg. Chem.*, 1989, **28**, 1587–1590.
- 3 G. Kresse and J. Furthmüller, *Comput. Mater. Sci.*, 1996, **6**, 15–50.
- 4 J. P. Perdew, K. Burke and M. Ernzerhof, *Phys. Rev. Lett.*, 1996, **77**, 3865.
- 5 S. Grimme, *J. Comput. Chem.*, 2006, **27**, 1787–1799.
- 6 X. Guo, S. Zhu, R. M. Kong, X. Zhang and F. Qu, *ACS Sustain. Chem. Eng.*, 2018, **6**, 1545–1549.
- 7 M. Xie, X. Xiong, L. Yang, X. Shi, A. M. Asiri and X. Sun, *Chem. Commun.*, 2018, **54**, 2300–2303.
- 8 S. Paul, S. Sarkar, D. Dolui, D. Sarkar, M. Robert and U. K. Ghorai, *Dalt. Trans.*, 2023, **52**, 15360–15364.
- 9 Z. Y. Wu, M. Karamad, X. Yong, Q. Huang, D. A. Cullen, P. Zhu, C. Xia, Q. Xiao, M. Shakouri, F. Y. Chen, J. Y. (Timothy) Kim, Y. Xia, K. Heck, Y. Hu, M. S. Wong, Q. Li, I. Gates, S. Siahrostami and H. Wang, *Nat. Commun.*, 2021, **12**, 1–10.
- 10 Y. Zha, M. Liu, J. Wang, J. Feng, D. Li, D. Zhao, S. Zhang and T. Shi, *RSC Adv.*, 2023, **13**, 9839–9844.
- 11 Z. Tang, Z. Bai, X. Li, L. Ding, B. Zhang and X. Chang, *Processes*, 2022, **10**, 751.
- 12 Y. Wang, C. Liu, B. Zhang and Y. Yu, *Sci. China Mater.*, 2020, **63**, 2530–2538.
- 13 J. Xu, S. Zhang, H. Liu, S. Liu, Y. Yuan, Y. Meng, M. Wang, C. Shen, Q. Peng, J. Chen, X. Wang, L. Song, K. Li and W. Chen, *Angew. Chemie Int. Ed.*, 2023, **62**, e202308044.
- 14 F. Lei, W. Xu, J. Yu, K. Li, J. Xie, P. Hao, G. Cui and B. Tang, *Chem. Eng. J.*, 2021, **426**, 131317.
- 15 G. F. Chen, Y. Yuan, H. Jiang, S. Y. Ren, L. X. Ding, L. Ma, T. Wu, J. Lu and H. Wang, *Nat. Energy*, 2020, **5**, 605–613.
- 16 J. Liang, B. Deng, Q. Liu, G. Wen, Q. Liu, T. Li, Y. Luo, A. A. Alshehri, K. A. Alzahrani, D. Ma and X. Sun, *Green Chem.*, 2021, **23**, 5487–5493.
- 17 P. Li, Z. Jin, Z. Fang and G. Yu, *Energy Environ. Sci.*, 2021, **14**, 3522–3531.
- 18 J. Yang, H. Qi, A. Li, X. Liu, X. Yang, S. Zhang, Q. Zhao, Q. Jiang, Y. Su, L. Zhang, J. F. Li, Z. Q. Tian, W. Liu, A. Wang and T. Zhang, *J. Am. Chem. Soc.*, 2022, **144**, 12062–12071.
- 19 S. Zhang, M. Li, J. Li, Q. Song and X. Liu, *Proc. Natl. Acad. Sci. U. S. A.*, 2022, **119**, e2115504119.
